# Supplementary material for: HPLC–UV–ESI MS/MS identification of the color constituents of sawwort (Serratula tinctoria L.)
Source: Springer Nature journal article supplement (doi:10.1007/s00216-013-7589-3), 2014-01-17
Supplement: 216_2013_7589_MOESM1_ESM.pdf [file 216_2013_7589_MOESM1_ESM.pdf]

## HPLC–UV–ESI MS/MS identification of the color constituents of sawwort

### (*Serratula tinctoria* L.)

Katarzyna Lech, Katarzyna Witkoś, Maciej Jarosz

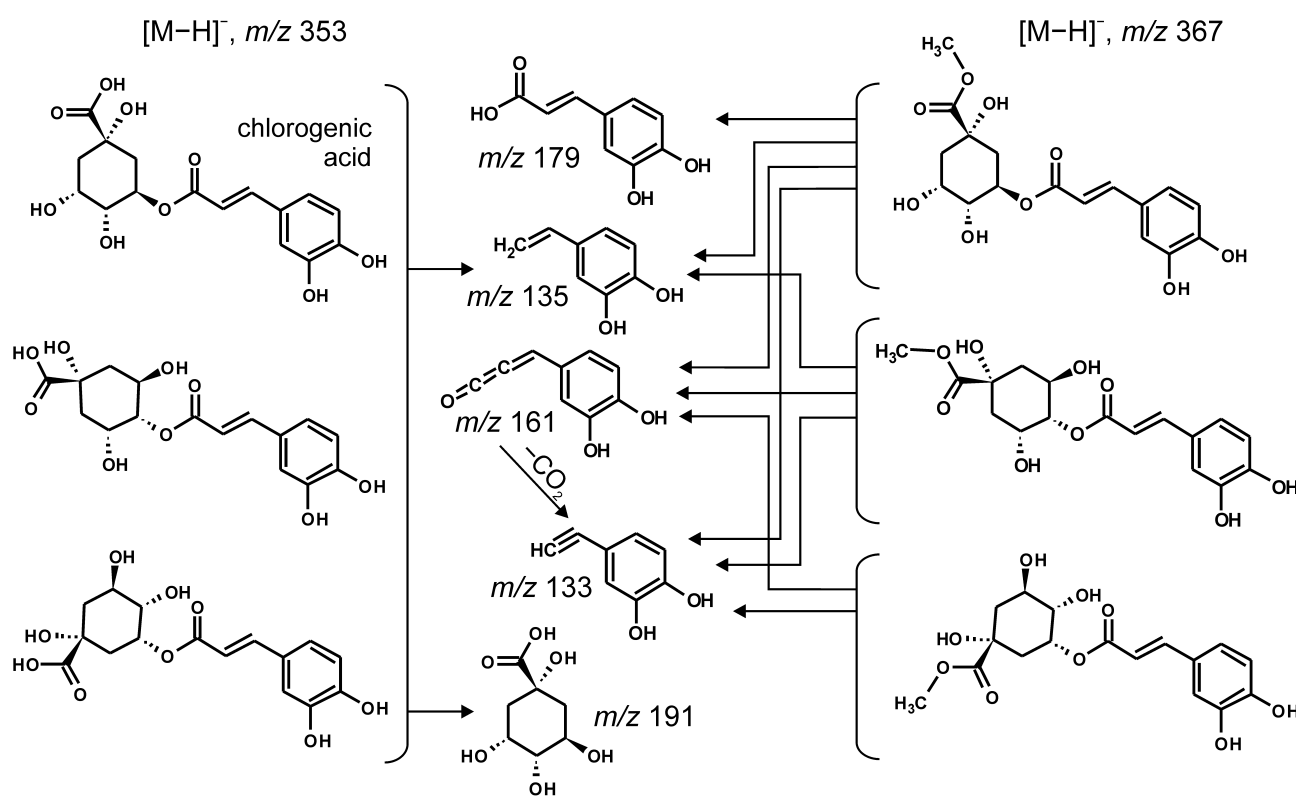

**Fig. S1.** Proposed structures and fragmentation pathways of chlorogenic acid isomers (left) and their methylated analogue (right)

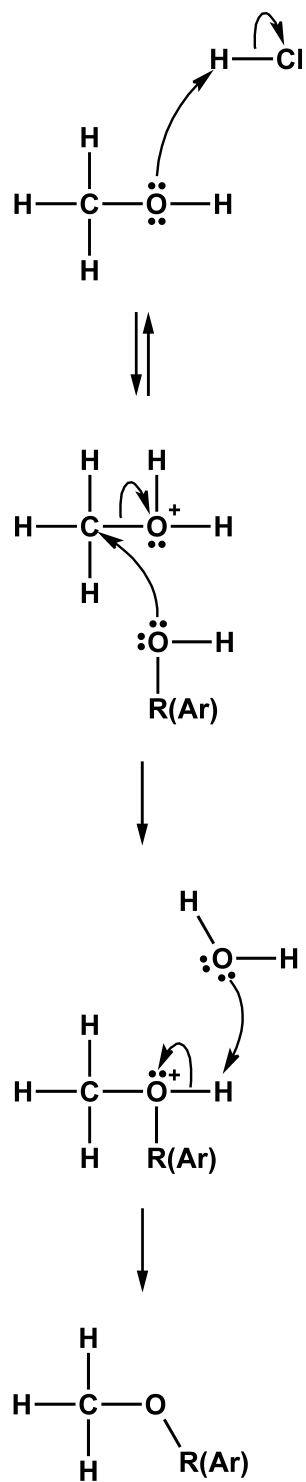

**Fig. S2.** Mechanism of an acid-catalyzed methylation of flavonoid glucuronides (R(Ar))
